# Supplementary material
Source: PubMed Central journal article supplement (PMC3993051)
Supplement: Supp_Fig1.pdf [file Supp_Fig1.pdf]

## Supplementary Data

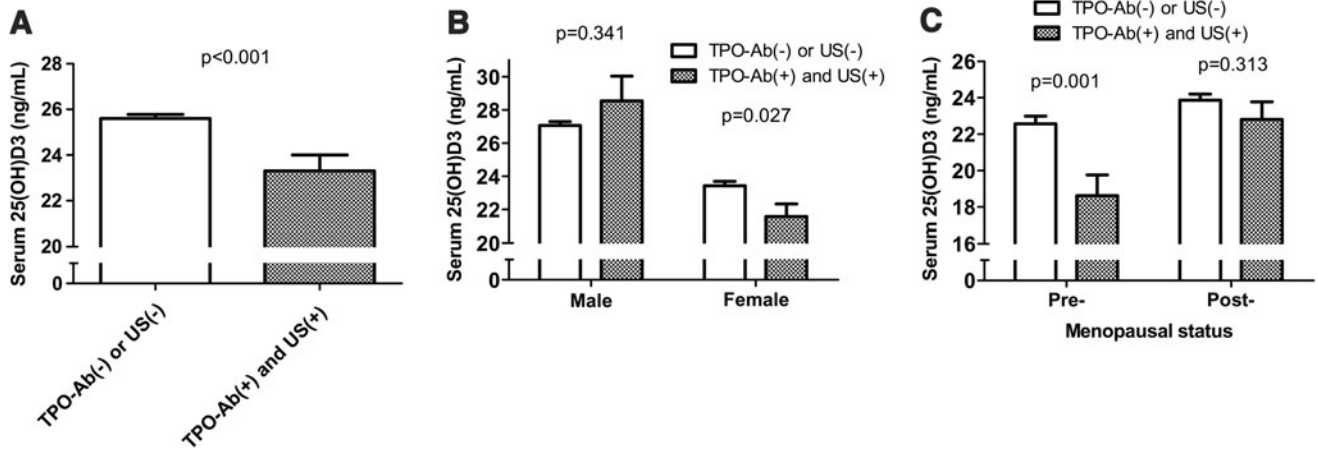

**SUPPLEMENTARY FIG. S1.** Serum levels of 25(OH)D3 in the study subjects from the TPO-Ab(+)/US(+) group and control group. (A) Levels of serum 25(OH)D3 in subjects from the TPO-Ab(+)/US(+) group and control group [TPO-Ab(-) or US(-)]. (B) Serum 25(OH)D3 levels according to the TPO-Ab/US positivity in male and female subjects. (C) Serum 25(OH)D3 levels according to the TPO-Ab/US positivity in pre- and postmenopausal women. 25(OH)D3, serum 25-hydroxy vitamin D3; TPO-Ab, anti-thyroid peroxidase antibody; US, ultrasound.
