# Supplementary material
Source: PubMed Central journal article supplement (PMC3993051)
Supplement: Supp_Table1.pdf [file Supp_Table1.pdf]

SUPPLEMENTARY TABLE S1. CHARACTERISTICS OF STUDY SUBJECTS IN TERMS  
OF THE LEVEL OF SERUM ANTI-THYROID PEROXIDASE ANTIBODY AND ULTRASOUND FINDINGS

|                                        | <i>TPO-Ab(-) or US(-)</i><br>(n=6327) | <i>TPO-Ab(+) and US(+)</i><br>(n=358) | p-Value |
|----------------------------------------|---------------------------------------|---------------------------------------|---------|
| Age (years)                            | 54.1±8.9                              | 54.0±7.6                              | 0.67    |
| Female [ <i>n</i> (%)]                 | 2523 (39.9)                           | 270 (75.4)                            | <0.001  |
| BMI (kg/m <sup>2</sup> )               | 24.2±3.2                              | 23.8±3.2                              | 0.021   |
| Smoking [ <i>n</i> (%)]                | 3164 (50.0)                           | 94 (26.3)                             | <0.001  |
| Serum calcium (mg/dL)                  | 8.8±0.3                               | 8.9±0.4                               | 0.528   |
| TSH <sup>a</sup> (mU/L)                | 2.0±1.0                               | 2.2±1.1                               | 0.127   |
| fT4 (ng/dL)                            | 1.3±0.2                               | 1.3±0.5                               | 0.698   |
| TPO-Ab <sup>a</sup> (U/mL)             | 11.7±10.1                             | 770.0±10.2                            | <0.001  |
| Health checkup seasons [ <i>n</i> (%)] |                                       |                                       | 0.312   |
| Spring                                 | 1829 (29)                             | 112 (31)                              |         |
| Summer                                 | 1805 (29)                             | 107 (30)                              |         |
| Autumn                                 | 1436 (23)                             | 82 (23)                               |         |
| Winter                                 | 1257 (20)                             | 57 (16)                               |         |
| Health checkup months [ <i>n</i> (%)]  |                                       |                                       | 0.144   |
| Mar                                    | 616 (10)                              | 33 (9)                                |         |
| Apr                                    | 636 (10)                              | 52 (14)                               |         |
| May                                    | 577 (9)                               | 27 (7)                                |         |
| Jun                                    | 589 (9)                               | 33 (9)                                |         |
| Jul                                    | 622 (10)                              | 45 (12)                               |         |
| Aug                                    | 594 (9)                               | 29 (8)                                |         |
| Sep                                    | 425 (7)                               | 30 (8)                                |         |
| Oct                                    | 507 (8)                               | 27 (8)                                |         |
| Nov                                    | 504 (8)                               | 25 (7)                                |         |
| Dec                                    | 343 (5)                               | 18 (5)                                |         |
| Jan                                    | 458 (7)                               | 18 (5)                                |         |
| Feb                                    | 456 (7)                               | 21 (7)                                |         |

<sup>a</sup>Geometric mean.

AITD, autoimmune thyroid disease; BMI, body mass index; fT4, free thyroxine; TPO-Ab, anti-thyroid peroxidase antibody; TSH, thyrotropin; US, ultrasound.
